# Supplementary material
Source: PubMed Central journal article supplement (PMC4310661)
Supplement: ASN.2014020173_ASN2014020173SupplementaryData.pdf [file ASN.2014020173_ASN2014020173SupplementaryData.pdf]

Supplemental Material

Supplemental Table 1. Improvement in prediction statistics for CVD risk by adding each additional subclinical measure to conventional predictors in CKD stage 1-2 vs. 3-5

| Predictors | CKD stage 1-2 <sup>†</sup> |                           |                           |                           |                           |                          |
|------------|----------------------------|---------------------------|---------------------------|---------------------------|---------------------------|--------------------------|
|            | ΔC-statistics‡             | Categorical NRI           |                           | Continuous NRI            |                           | IDI                      |
|            |                            | Event                     | Non-Event                 | Event                     | Non-Event                 |                          |
| CAC        | 0.027<br>(-0.022, 0.076)   | 0.045<br>(-0.100, 0.206)  | 0.077<br>(0.015, 0.133)   | 0.274<br>(0.023, 0.503)   | 0.222<br>(0.127, 0.323)   | 0.036<br>(0.019, 0.053)  |
| IMT        | 0.010<br>(-0.012, 0.032)   | -0.001<br>(-0.095, 0.075) | 0.005<br>(-0.037, 0.045)  | 0.076<br>(-0.165, 0.356)  | 0.215<br>(0.118, 0.305)   | 0.004<br>(-0.003, 0.011) |
| ABI        | 0.010<br>(-0.016, 0.036)   | 0.001<br>(-0.092, 0.112)  | 0.032<br>(-0.033, 0.068)  | -0.087<br>(-0.344, 0.175) | 0.028<br>(-0.087, 0.121)  | 0.009<br>(-0.001, 0.023) |
| Predictors | CKD stage 3-5              |                           |                           |                           |                           |                          |
|            | ΔC-statistics‡             | Categorical NRI           |                           | Continuous NRI            |                           | IDI                      |
|            |                            | Event                     | Non-Event                 | Event                     | Non-Event                 |                          |
| CAC        | 0.028<br>(-0.000, 0.055)   | 0.062<br>(-0.066, 0.182)  | -0.007<br>(-0.044, 0.033) | 0.318<br>(0.123, 0.486)   | 0.125<br>(0.050, 0.200)   | 0.029<br>(0.011, 0.045)  |
| IMT        | -0.000<br>(-0.007, 0.006)  | 0.011<br>(-0.033, 0.066)  | -0.009<br>(-0.032, 0.015) | -0.041<br>(-0.244, 0.140) | 0.174<br>(0.101, 0.248)   | 0.004<br>(-0.000, 0.009) |
| ABI        | 0.008<br>(-0.002, 0.018)   | -0.054<br>(-0.117, 0.010) | 0.011<br>(-0.010, 0.048)  | -0.166<br>(-0.346, 0.015) | -0.009<br>(-0.080, 0.067) | 0.001<br>(-0.006, 0.010) |

NRI: net reclassification improvement, IDI: integrated discrimination improvement, CAC: coronary artery calcium, IMT: intima-media thickness, ABI: ankle brachial index

<sup>†</sup>CKD stage 1-2 and 3-5 were defined as eGFR ≥60 ml/min/1.73m<sup>2</sup> +ACR ≥30 mg/g and eGFR <60 ml/min/1.73m<sup>2</sup>, respectively.

<sup>‡</sup>C-statistic with conventional predictors, eGFR and ACR was 0.706 in CKD stage 1-2 and 0.742 in CKD stage 3-5.

Supplemental Table 2. Improvement in prediction statistics for CVD risk by adding each additional subclinical measure to conventional predictors in CKD aged < vs. ≥65 years old

| Predictors | CKD <sup>†</sup> & age<65  |                           |                           |                           |                          |                          |
|------------|----------------------------|---------------------------|---------------------------|---------------------------|--------------------------|--------------------------|
|            | ΔC-statistics‡             | Categorical NRI           |                           | Continuous NRI            |                          | IDI                      |
|            |                            | Event                     | Non-Event                 | Event                     | Non-Event                |                          |
| CAC        | 0.027<br>(-0.030, 0.083)   | 0.184<br>(-0.072, 0.381)  | 0.032<br>(-0.028, 0.085)  | 0.416<br>(0.035, 0.710)   | 0.469<br>(0.382, 0.567)  | 0.107<br>(0.053, 0.182)  |
| IMT        | 0.014<br>(-0.023, 0.051)   | 0.192<br>(0.000, 0.389)   | 0.012<br>(-0.064, 0.052)  | 0.236<br>(-0.144, 0.581)  | 0.406<br>(0.305, 0.494)  | 0.041<br>(0.005, 0.088)  |
| ABI        | -0.001<br>(-0.025, 0.024)  | -0.094<br>(-0.234, 0.030) | -0.006<br>(-0.043, 0.034) | -0.284<br>(-0.617, 0.074) | 0.043<br>(-0.060, 0.151) | 0.034<br>(0.005, 0.072)  |
| Predictors | CKD <sup>†</sup> & age 65+ |                           |                           |                           |                          |                          |
|            | ΔC-statistics‡             | Categorical NRI           |                           | Continuous NRI            |                          | IDI                      |
|            |                            | Event                     | Non-Event                 | Event                     | Non-Event                |                          |
| CAC        | 0.030<br>(0.001, 0.059)    | 0.092<br>(-0.019, 0.179)  | 0.051<br>(0.011, 0.092)   | 0.343<br>(0.176, 0.492)   | 0.041<br>(-0.031, 0.111) | 0.020<br>(0.011, 0.029)  |
| IMT        | 0.002<br>(-0.005, 0.009)   | 0.023<br>(-0.017, 0.070)  | 0.006<br>(-0.021, 0.024)  | -0.016<br>(-0.178, 0.163) | 0.154<br>(0.082, 0.226)  | 0.002<br>(-0.000, 0.004) |
| ABI        | 0.010<br>(-0.008, 0.028)   | -0.005<br>(-0.061, 0.054) | 0.021<br>(-0.006, 0.043)  | -0.159<br>(-0.315, 0.021) | 0.101<br>(0.032, 0.168)  | 0.008<br>(0.000, 0.017)  |

NRI: net reclassification improvement, IDI: integrated discrimination improvement, CAC: coronary artery calcium, IMT: intima-media thickness, ABI: ankle brachial index

<sup>†</sup>CKD was defined as eGFR using the CKD-EPI equation <60 ml/min/1.73m<sup>2</sup> or ACR ≥30 mg/g.

<sup>‡</sup>C-statistic with conventional predictors, eGFR and ACR was 0.813 in CKD and age <65 and 0.686 in CKD and age 65+.

Supplemental Table 3. Improvement in prediction statistics for CVD risk by adding each additional subclinical measure to conventional predictors in CKD eGFR <45 and/or ACR 30+

| Predictors | eGFR <45 and/or ACR 30+            |                           |                          |                           |                          | IDI                     |
|------------|------------------------------------|---------------------------|--------------------------|---------------------------|--------------------------|-------------------------|
|            | $\Delta$ C-statistics <sup>‡</sup> | Categorical NRI           |                          | Continuous NRI            |                          |                         |
|            |                                    | Event                     | Non-Event                | Event                     | Non-Event                |                         |
| CAC        | 0.026<br>(-0.006, 0.057)           | 0.009<br>(-0.107, 0.118)  | 0.076<br>(0.032, 0.121)  | 0.296<br>(0.115, 0.469)   | 0.147<br>(0.064, 0.223)  | 0.027<br>(0.017, 0.038) |
| IMT        | 0.012<br>(-0.003, 0.027)           | -0.005<br>(-0.070, 0.057) | 0.023<br>(-0.003, 0.050) | 0.091<br>(-0.097, 0.292)  | 0.229<br>(0.148, 0.308)  | 0.008<br>(0.002, 0.016) |
| ABI        | 0.012<br>(-0.010, 0.035)           | -0.027<br>(-0.106, 0.056) | 0.029<br>(-0.004, 0.064) | -0.110<br>(-0.285, 0.075) | 0.067<br>(-0.017, 0.160) | 0.021<br>(0.008, 0.036) |

NRI: net reclassification improvement, IDI: integrated discrimination improvement, CAC: coronary artery calcium, IMT: intima-media thickness, ABI: ankle brachial index

<sup>‡</sup>C-statistic with conventional predictors, eGFR and ACR was 0.684 in CKD and 0.748 in non-CKD.

Supplemental Table 4. Improvement in prediction statistics for CHD risk by adding each additional subclinical measure to conventional predictors

| Predictors       | $\Delta$ C-statistics*   | Categorical NRI           |                            | Continuous NRI            |                         | IDI                     |
|------------------|--------------------------|---------------------------|----------------------------|---------------------------|-------------------------|-------------------------|
|                  |                          | Event                     | Non-event                  | Event                     | Non-event               |                         |
| CKD <sup>†</sup> |                          |                           |                            |                           |                         |                         |
| CAC <sup>‡</sup> | 0.074<br>(0.029, 0.119)  | 0.166<br>(0.025, 0.294)   | 0.078<br>(0.040, 0.114)    | 0.312<br>(0.122, 0.513)   | 0.240<br>(0.182, 0.297) | 0.045<br>(0.034, 0.059) |
| IMT <sup>§</sup> | 0.006<br>(-0.008, 0.021) | -0.022<br>(-0.112, 0.071) | 0.025<br>(0.004, 0.047)    | -0.031<br>(-0.257, 0.161) | 0.201<br>(0.145, 0.259) | 0.006<br>(0.001, 0.012) |
| ABI              | 0.003<br>(-0.010, 0.017) | -0.022<br>(-0.096, 0.054) | 0.019<br>(0.000, 0.042)    | -0.145<br>(-0.360, 0.059) | 0.094<br>(0.037, 0.150) | 0.004<br>(0.000, 0.009) |
| Non-CKD          |                          |                           |                            |                           |                         |                         |
| CAC <sup>‡</sup> | 0.060<br>(0.032, 0.088)  | 0.219<br>(0.114, 0.309)   | -0.035<br>(-0.047, -0.024) | 0.340<br>(0.177, 0.469)   | 0.287<br>(0.259, 0.311) | 0.022<br>(0.019, 0.027) |
| IMT <sup>§</sup> | 0.011<br>(0.0001, 0.022) | -0.037<br>(-0.100, 0.025) | 0.009<br>(0.001, 0.016)    | -0.056<br>(-0.204, 0.087) | 0.158<br>(0.131, 0.188) | 0.005<br>(0.003, 0.007) |
| ABI              | 0.011<br>(-0.002, 0.024) | 0.031<br>(-0.040, 0.101)  | 0.012<br>(0.005, 0.019)    | 0.067<br>(-0.092, 0.231)  | 0.103<br>(0.077, 0.129) | 0.009<br>(0.006, 0.013) |

NRI: net reclassification improvement, IDI: integrated discrimination improvement, CAC: coronary artery calcium, IMT: carotid intima-media thickness, ABI: ankle-brachial index.

\*C-statistic with only conventional predictors was 0.704 in CKD and 0.737 in non-CKD.

<sup>†</sup>CKD was defined as eGFR using the CKD-EPI equation <60 ml/min/1.73m<sup>2</sup> or ACR ≥30 mg/g.

<sup>‡</sup>ln(CAC score + 1), <sup>§</sup>Z score for overall maximal internal common carotid IMT

Supplemental Table 5. Improvement in prediction statistics for stroke risk by adding each additional subclinical measure to conventional predictors

| Predictors | $\Delta$ C-statistics*      | Categorical NRI         | Continuous NRI            | IDI                      |
|------------|-----------------------------|-------------------------|---------------------------|--------------------------|
|            | CKD†                        |                         |                           |                          |
| CAC‡       | -0.0006<br>(-0.002, 0.001)  | NA                      | 0.020<br>(-0.291, 0.359)  | 0.000<br>(-0.000, 0.000) |
| IMT§       | -0.003<br>(-0.009, 0.003)   | NA                      | 0.188<br>(-0.126, 0.517)  | 0.000<br>(-0.000, 0.001) |
| ABI        | 0.006<br>(-0.005, 0.017)    | NA                      | -0.065<br>(-0.403, 0.280) | 0.001<br>(-0.000, 0.004) |
| Non-CKD    |                             |                         |                           |                          |
| CAC‡       | 0.002<br>(-0.019, 0.022)    | NA                      | 0.284<br>(-0.009, 0.606)  | 0.002<br>(0.001, 0.003)  |
| IMT§       | 0.0002<br>(-0.0004, 0.0007) | NA                      | -0.022<br>(-0.284, 0.322) | 0.000<br>(-0.000, 0.000) |
| ABI        | 0.004<br>(-0.003, 0.011)    | 0.023<br>(0.015, 0.057) | -0.103<br>(-0.390, 0.219) | 0.000<br>(-0.000, 0.001) |

NRI: net reclassification improvement, IDI: integrated discrimination improvement, CAC: coronary artery calcium, IMT: carotid intima-media thickness, ABI: ankle-brachial index, NA: NRI was not available due to no reclassification to higher or lower risk categories in some bootstrap samples.

\*C-statistic with only conventional predictors was 0.745 in CKD and 0.778 in non-CKD.

†CKD was defined as eGFR using the CKD-EPI equation <60 ml/min/1.73m<sup>2</sup> or ACR ≥30 mg/g.

‡ln(CAC score + 1), §Z score for overall maximal internal common carotid IMT

Supplemental Table 6. Improvement in prediction statistics for HF risk by adding each additional subclinical measure to conventional predictors

| Predictors | $\Delta$ C-statistics*      | Categorical NRI          | Continuous NRI             | IDI                       |
|------------|-----------------------------|--------------------------|----------------------------|---------------------------|
|            | CKD†                        |                          |                            |                           |
| CAC‡       | 0.020<br>(-0.020, 0.059)    | 0.086<br>(-0.067, 0.238) | 0.431<br>(0.131, 0.670)    | 0.008<br>(0.004, 0.013)   |
| IMT§       | 0.006<br>(-0.002m 0.013)    | 0.004<br>(-0.068, 0.110) | 0.208<br>(-0.108, 0.499)   | 0.000<br>(-0.001, 0.001)  |
| ABI        | 0.0004<br>(-0.002m 0.003)   | NA                       | -0.340<br>(-0.607, -0.046) | 0.000<br>(-0.000, 0.000)  |
| Non-CKD    |                             |                          |                            |                           |
| CAC‡       | -0.001<br>(-0.024, 0.022)   | 0.098<br>(0.020, 0.215)  | 0.299<br>(0.051, 0.565)    | 0.003<br>(0.002, 0.005)   |
| IMT§       | 0.0004<br>(-0.002, 0.003)   | NA                       | -0.095<br>(-0.324, 0.150)  | 0.000<br>(-0.000, 0.000)  |
| ABI        | 0.0006<br>(-0.0003, 0.0015) | NA                       | 0.374<br>(0.138, 0.603)    | -0.000<br>(-0.000, 0.000) |

NRI: net reclassification improvement, IDI: integrated discrimination improvement, CAC: coronary artery calcium, IMT: carotid intima-media thickness, ABI: ankle-brachial index, NA: NRI was not available due to no reclassification to higher or lower risk categories in some bootstrap samples.

\*C-statistic with only conventional predictors was 0.741 in CKD and 0.785 in non-CKD.

†CKD was defined as eGFR using the CKD-EPI equation <60 ml/min/1.73m<sup>2</sup> or ACR ≥30 mg/g.

‡ln(CAC score + 1), §Z score for overall maximal internal common carotid IMT

Supplemental Table 7. Improvement in prediction statistics for PAD risk by adding each additional subclinical measure to conventional predictors

| Predictors | $\Delta$ C-statistics*   | Categorical NRI          | Continuous NRI           | IDI                      |
|------------|--------------------------|--------------------------|--------------------------|--------------------------|
|            | CKD†                     |                          |                          |                          |
| CAC‡       | 0.016<br>(-0.025, 0.057) | 0.259<br>(0.094, 0.481)  | 0.498<br>(0.101, 0.832)  | 0.019<br>(0.002, 0.042)  |
| IMT§       | 0.027<br>(-0.011, 0.066) | NA                       | 0.300<br>(-0.126, 0.685) | 0.001<br>(-0.009, 0.011) |
| ABI        | 0.092<br>(0.009, 0.176)  | 0.301<br>(-0.034, 0.604) | 0.787<br>(0.357, 1.147)  | 0.155<br>(0.074, 0.271)  |
| Non-CKD    |                          |                          |                          |                          |
| CAC‡       | 0.055<br>(0.010, 0.100)  | NA                       | 1.045<br>(0.665, 1.250)  | 0.008<br>(0.005, 0.015)  |
| IMT§       | 0.024<br>(-0.004, 0.052) | NA                       | 0.551<br>(0.133, 0.910)  | 0.003<br>(0.001, 0.008)  |
| ABI        | 0.071<br>(0.016, 0.126)  | 0.279<br>(0.020, 0.552)  | 0.370<br>(-0.049, 0.770) | 0.037<br>(0.018, 0.076)  |

NRI: net reclassification improvement, IDI: integrated discrimination improvement, CAC: coronary artery calcium, IMT: carotid intima-media thickness, ABI: ankle-brachial index, NA: NRI was not available due to no reclassification to higher or lower risk categories in some bootstrap samples.

\*C-statistic with only conventional predictors was 0.806 in CKD and 0.852 in non-CKD.

†CKD was defined as eGFR using the CKD-EPI equation <60 ml/min/1.73m<sup>2</sup> or ACR ≥30 mg/g.

‡ln(CAC score + 1), §Z score for overall maximal internal common carotid IMT
